# Supplementary material for: Glycosylated Porphyra-334 and Palythine-Threonine from the Terrestrial Cyanobacterium Nostoc commune
Source: MDPI journal article supplement (doi:10.3390/md11093124), 2013-08-26
Supplement: s3 [file s3]

marinedrugs-11-03124-s001.mol
  ChemDraw11271322142D

 42 44  0  0  0  0  0  0  0  0999 V2000
   -4.2868    2.4750    0.0000 C   0  0  0  0  0  0  0  0  0  0  0  0
   -4.2868    1.6500    0.0000 C   0  0  0  0  0  0  0  0  0  0  0  0
   -3.5724    1.2375    0.0000 C   0  0  0  0  0  0  0  0  0  0  0  0
   -2.8579    1.6500    0.0000 C   0  0  0  0  0  0  0  0  0  0  0  0
   -2.8579    2.4750    0.0000 O   0  0  0  0  0  0  0  0  0  0  0  0
   -3.5724    2.8875    0.0000 C   0  0  0  0  0  0  0  0  0  0  0  0
   -3.5724    3.7125    0.0000 C   0  0  0  0  0  0  0  0  0  0  0  0
   -4.2868    4.1250    0.0000 O   0  0  0  0  0  0  0  0  0  0  0  0
   -5.0013    2.8875    0.0000 O   0  0  0  0  0  0  0  0  0  0  0  0
   -5.0013    1.2375    0.0000 O   0  0  0  0  0  0  0  0  0  0  0  0
   -3.5724    0.4125    0.0000 O   0  0  0  0  0  0  0  0  0  0  0  0
   -2.1434    1.2375    0.0000 O   0  0  0  0  0  0  0  0  0  0  0  0
   -0.7145    1.2375    0.0000 C   0  0  0  0  0  0  0  0  0  0  0  0
   -1.4289    1.6500    0.0000 C   0  0  0  0  0  0  0  0  0  0  0  0
   -1.4289    2.4750    0.0000 C   0  0  0  0  0  0  0  0  0  0  0  0
    0.7145    0.4125    0.0000 C   0  0  0  0  0  0  0  0  0  0  0  0
    0.7145    1.2375    0.0000 C   0  0  0  0  0  0  0  0  0  0  0  0
    0.0000    1.6500    0.0000 N   0  0  0  0  0  0  0  0  0  0  0  0
    1.4289    0.0000    0.0000 C   0  0  0  0  0  0  0  0  0  0  0  0
    2.1434    0.4125    0.0000 C   0  0  0  0  0  0  0  0  0  0  0  0
    2.1434    1.2375    0.0000 C   0  0  0  0  0  0  0  0  0  0  0  0
    1.4289    1.6500    0.0000 C   0  0  0  0  0  0  0  0  0  0  0  0
    2.8579    1.6500    0.0000 N   0  0  0  0  0  0  0  0  0  0  0  0
    1.4289    2.4750    0.0000 O   0  0  0  0  0  0  0  0  0  0  0  0
    2.1434    2.8875    0.0000 C   0  0  0  0  0  0  0  0  0  0  0  0
    0.7145   -0.4125    0.0000 O   0  0  0  0  0  0  0  0  0  0  0  0
    2.1434   -1.2375    0.0000 O   0  0  0  0  0  0  0  0  0  0  0  0
    2.1434   -0.4125    0.0000 C   0  0  0  0  0  0  0  0  0  0  0  0
    2.8579   -2.4750    0.0000 O   0  0  0  0  0  0  0  0  0  0  0  0
    2.8579   -1.6500    0.0000 C   0  0  0  0  0  0  0  0  0  0  0  0
    3.5724   -2.8875    0.0000 C   0  0  0  0  0  0  0  0  0  0  0  0
    4.2868   -2.4750    0.0000 C   0  0  0  0  0  0  0  0  0  0  0  0
    4.2868   -1.6500    0.0000 C   0  0  0  0  0  0  0  0  0  0  0  0
    3.5724   -1.2375    0.0000 C   0  0  0  0  0  0  0  0  0  0  0  0
    3.5724   -0.4125    0.0000 O   0  0  0  0  0  0  0  0  0  0  0  0
    2.8579   -4.1250    0.0000 O   0  0  0  0  0  0  0  0  0  0  0  0
    3.5724   -3.7125    0.0000 C   0  0  0  0  0  0  0  0  0  0  0  0
    5.0013   -2.8875    0.0000 O   0  0  0  0  0  0  0  0  0  0  0  0
    5.0013   -1.2375    0.0000 O   0  0  0  0  0  0  0  0  0  0  0  0
   -0.7151    0.4125    0.0000 C   0  0  0  0  0  0  0  0  0  0  0  0
   -0.0006    0.0000    0.0000 O   0  0  0  0  0  0  0  0  0  0  0  0
   -1.4296    0.0000    0.0000 O   0  0  0  0  0  0  0  0  0  0  0  0
  1  2  1  0      
  2  3  1  0      
  3  4  1  0      
  4  5  1  0      
  5  6  1  0      
  6  1  1  0      
  6  7  1  0      
  7  8  1  0      
  9  1  1  0      
 10  2  1  0      
  3 11  1  0      
 12  4  1  0      
 13 14  1  0      
 14 12  1  0      
 14 15  1  0      
 16 17  1  0      
 17 18  1  0      
 18 13  1  0      
 16 19  1  0      
 19 20  1  0      
 20 21  1  0      
 21 22  1  0      
 22 17  2  0      
 23 21  2  0      
 22 24  1  0      
 24 25  1  0      
 19 26  1  0      
 27 28  1  0      
 28 19  1  0      
 29 30  1  0      
 30 27  1  0      
 29 31  1  0      
 31 32  1  0      
 32 33  1  0      
 33 34  1  0      
 34 30  1  0      
 34 35  1  0      
 36 37  1  0      
 37 31  1  0      
 32 38  1  0      
 39 33  1  0      
 13 40  1  0      
 40 41  2  0      
 40 42  1  0      
M  STY  1   1 SUP
M  SLB  1   1   1
M  SAL   1  3  40  41  42
M  SBL   1  1  42
M  SMT   1 CO2H
M  SBV   1 42   -7.1411    5.4450
M  END
